# Supplementary material for: Marine nitrogen fixation as a possible source of atmospheric water-soluble organic nitrogen aerosols in the subtropical North Pacific
Source: Copernicus journal article supplement (doi:10.5194/egusphere-2022-561), 2022-07-20
Supplement: Supplementary file 1 [file egusphere-2022-561-supplement.pdf]

*Supplement of*

**Marine nitrogen fixation as a possible source of atmospheric water-soluble organic nitrogen aerosols in the subtropical North Pacific**

**Tsukasa Dobashi et al.**

*Correspondence to:* Yuzo Miyazaki (yuzom@lowtem.hokudai.ac.jp)

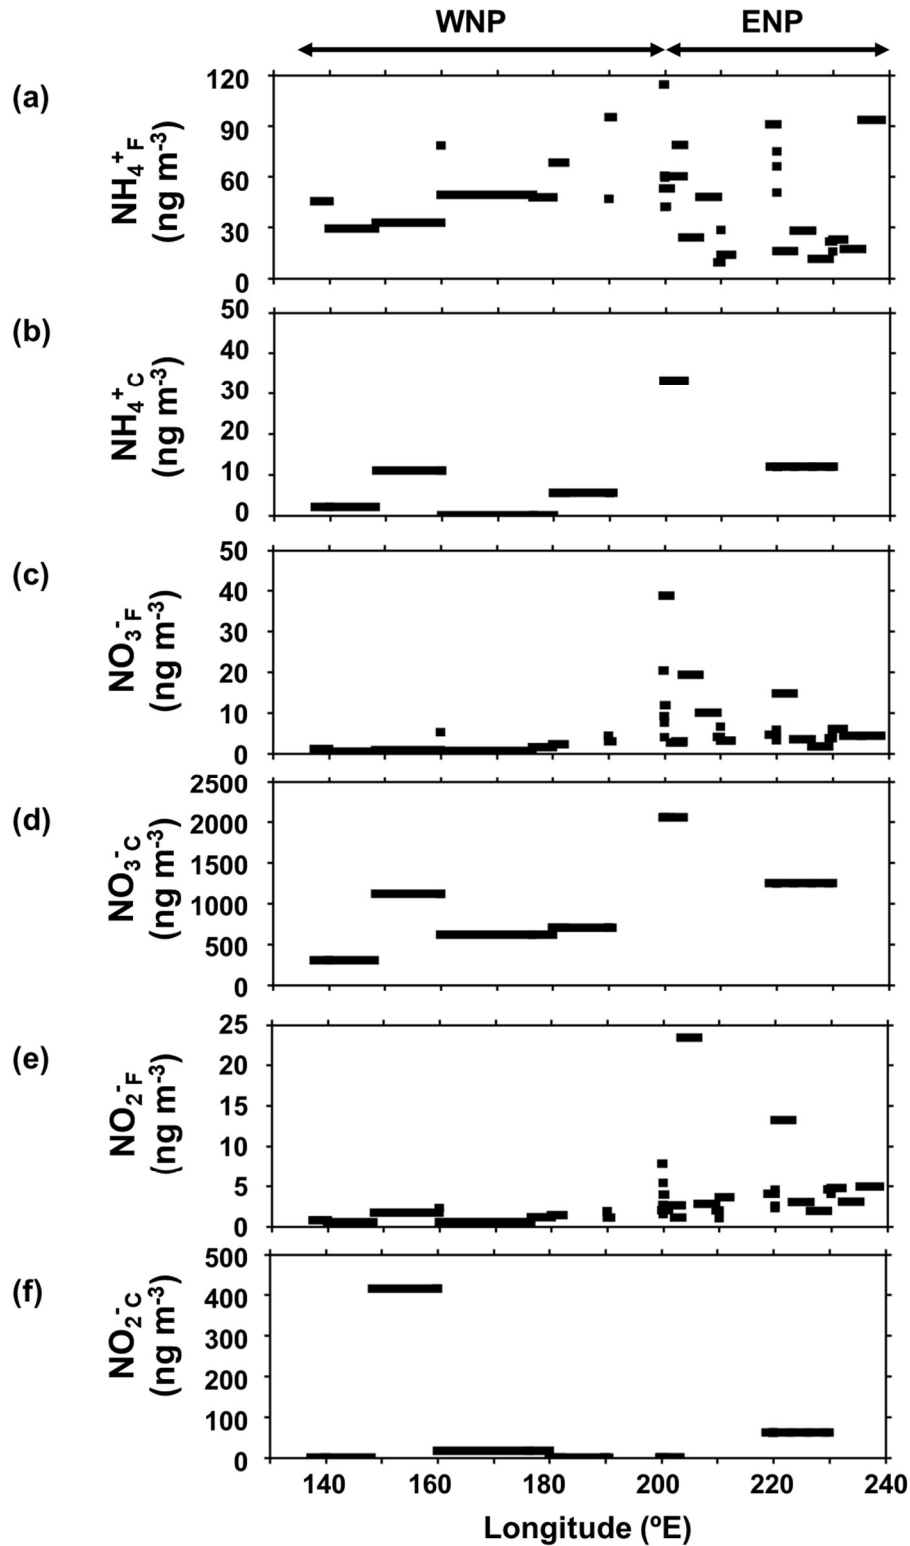

Figure S1: Longitudinal distributions of mass concentrations of (a)  $\text{NH}_4^+\text{F}$ , (b)  $\text{NH}_4^+\text{C}$ , (c)  $\text{NO}_3^-\text{F}$ , (d)  $\text{NO}_3^-\text{C}$ , (e)  $\text{NO}_2^-\text{F}$ , and (f)  $\text{NO}_2^-\text{C}$  along 23°N.

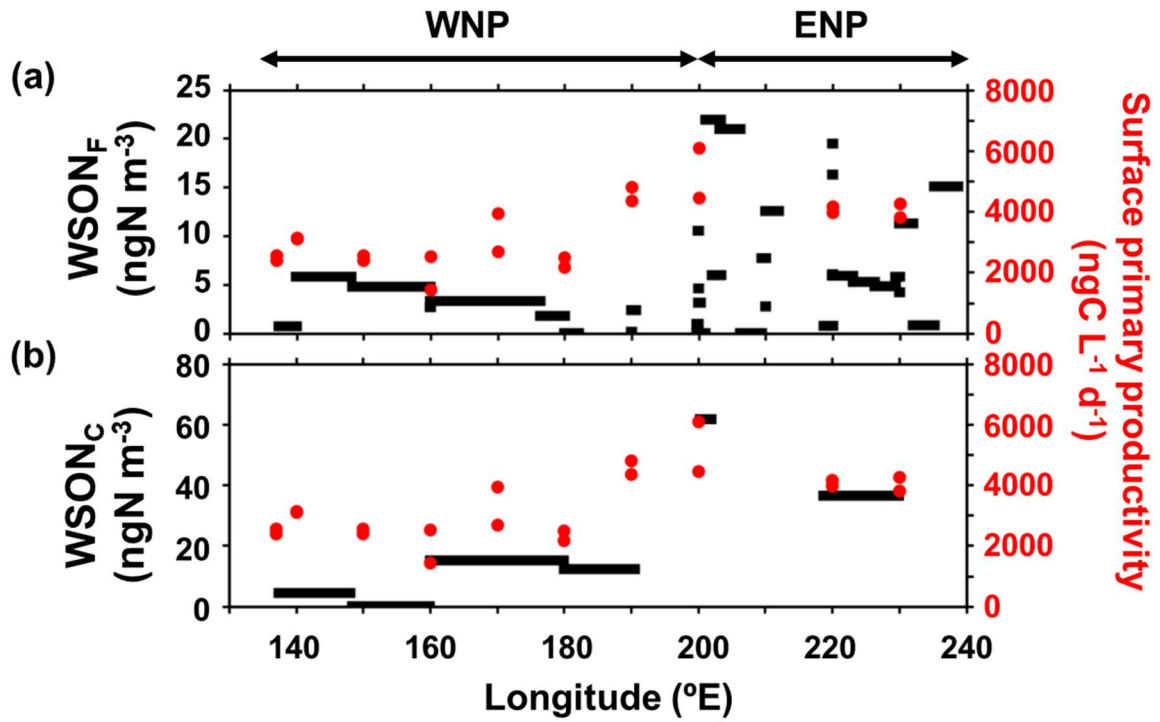

Figure S2: Longitudinal distributions of mass concentrations of (a)  $WSON_F$  and (b)  $WSON_C$ , together with primary productivity in the SSW samples during the entire cruise.

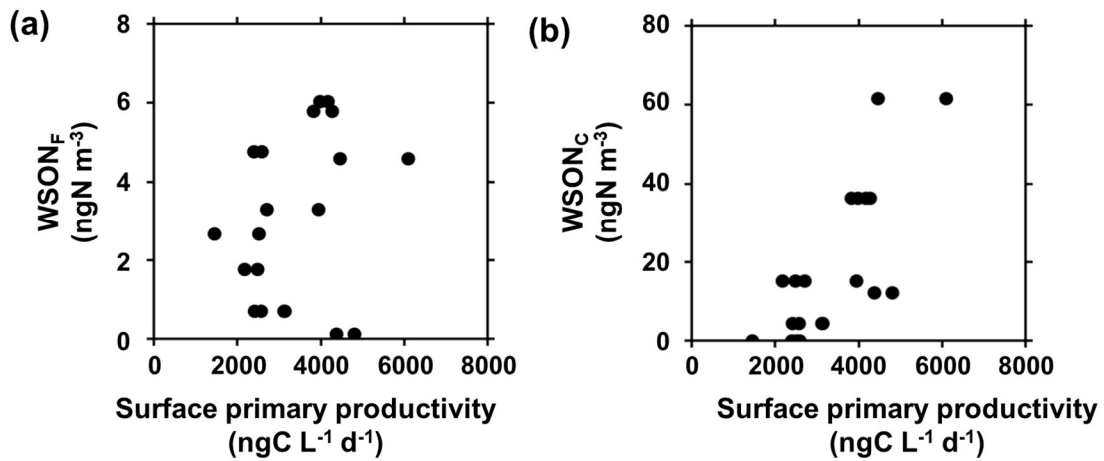

Figure S3: The mass concentrations of (a)  $WSON_F$  and (b)  $WSON_C$  as a function of primary productivity in SSW.

**Table S1: The data of fine particles analysed in this study.**

| Sample ID | Start Date (UTC) | Start Time (UTC) | End Date (UTC) | End Time (UTC) | WSO <sub>N</sub> (ngN m <sup>-3</sup> ) | WSO <sub>C</sub> (ngC m <sup>-3</sup> ) | δ <sup>13</sup> C <sub>wsoc</sub> (‰) | NH <sub>4</sub> <sup>+</sup> (ng m <sup>-3</sup> ) | NO <sub>3</sub> <sup>-</sup> (ng m <sup>-3</sup> ) | NO <sub>2</sub> <sup>-</sup> (ng m <sup>-3</sup> ) | Na <sup>+</sup> (ng m <sup>-3</sup> ) | MSA (ng m <sup>-3</sup> ) |
|-----------|------------------|------------------|----------------|----------------|-----------------------------------------|-----------------------------------------|---------------------------------------|----------------------------------------------------|----------------------------------------------------|----------------------------------------------------|---------------------------------------|---------------------------|
| HV3       | 2017/8/13        | 04:29            | 2017/8/13      | 15:07          | 19.1                                    | 16.7                                    | LOD                                   | 98.6                                               | 35.9                                               | 3.6                                                | 58.4                                  | 94.3                      |
| HV4       | 2017/8/13        | 15:18            | 2017/8/14      | 03:04          | 37.1                                    | LOD                                     | LOD                                   | 113.6                                              | 10.8                                               | 1.7                                                | 185.2                                 | 205.3                     |
| HV5       | 2017/8/14        | 03:21            | 2017/8/14      | 15:02          | 22.7                                    | 25.7                                    | LOD                                   | 124.1                                              | 0.8                                                | 1.2                                                | 141.8                                 | 202.2                     |
| HV7       | 2017/8/15        | 03:08            | 2017/8/15      | 14:53          | 15.6                                    | 25.0                                    | LOD                                   | 67.9                                               | 1.1                                                | 1.5                                                | 88.7                                  | 160.4                     |
| HV8       | 2017/8/15        | 15:08            | 2017/8/16      | 02:52          | 18.5                                    | 11.8                                    | LOD                                   | 62.3                                               | 5.1                                                | 0.7                                                | 63.9                                  | 176.5                     |
| HV11      | 2017/8/16        | 15:16            | 2017/8/17      | 02:56          | 34.5                                    | 72.1                                    | -22.2                                 | 118.6                                              | 6.7                                                | 2.4                                                | 83.9                                  | 184.2                     |
| HV12      | 2017/8/17        | 03:39            | 2017/8/17      | 14:53          | 95.1                                    | 1160.3                                  | -23.1                                 | 371.9                                              | 6.2                                                | 1.7                                                | 151.0                                 | 249.9                     |
| HV14      | 2017/8/17        | 15:10            | 2017/8/18      | 02:53          | 95.0                                    | 1739.7                                  | -22.5                                 | 365.3                                              | 5.7                                                | 1.6                                                | 166.3                                 | 179.1                     |
| HV15      | 2017/8/18        | 03:07            | 2017/8/18      | 15:53          | 28.6                                    | 117.0                                   | LOD                                   | 192.1                                              | 6.1                                                | 3.5                                                | 62.4                                  | 106.3                     |
| HV16      | 2017/8/18        | 16:10            | 2017/8/19      | 03:52          | 28.5                                    | 111.5                                   | LOD                                   | 127.8                                              | 2.3                                                | 1.3                                                | 39.7                                  | 74.6                      |
| HV17      | 2017/8/19        | 04:16            | 2017/8/19      | 15:54          | 44.8                                    | 551.5                                   | -21.6                                 | 256.4                                              | 2.9                                                | 1.6                                                | 55.0                                  | 94.1                      |
| HV18      | 2017/8/19        | 16:04            | 2017/8/20      | 03:52          | 12.1                                    | 311.3                                   | -20.4                                 | 192.1                                              | 4.9                                                | 1.6                                                | 68.2                                  | 73.6                      |
| HV19      | 2017/8/20        | 04:08            | 2017/8/20      | 15:55          | 17.7                                    | LOD                                     | LOD                                   | 164.4                                              | 5.4                                                | 1.3                                                | 34.9                                  | 63.0                      |
| HV2       | 2017/8/20        | 16:10            | 2017/8/21      | 03:51          | 74.7                                    | 116.0                                   | LOD                                   | 257.3                                              | 13.0                                               | 1.9                                                | 10.7                                  | 49.7                      |
| HV22      | 2017/8/21        | 16:04            | 2017/8/22      | 03:50          | 18.5                                    | LOD                                     | LOD                                   | 258.1                                              | 13.2                                               | 2.2                                                | 59.7                                  | 54.6                      |
| HV23      | 2017/8/22        | 04:08            | 2017/8/22      | 16:25          | 18.6                                    | 38.2                                    | LOD                                   | 275.2                                              | 11.8                                               | 1.6                                                | 10.6                                  | 40.5                      |
| HV24      | 2017/8/22        | 16:43            | 2017/8/23      | 03:51          | 19.2                                    | 364.0                                   | -18.8                                 | 292.4                                              | 9.4                                                | 4.2                                                | 22.1                                  | 62.6                      |
| HV25      | 2017/8/23        | 04:11            | 2017/8/23      | 17:09          | 15.1                                    | 178.4                                   | -20.1                                 | 93.4                                               | 4.3                                                | 4.9                                                | 14.3                                  | 19.0                      |
| HV26      | 2017/8/23        | 17:20            | 2017/8/24      | 04:54          | 0.8                                     | LOD                                     | LOD                                   | 17.2                                               | 4.3                                                | 3.0                                                | LOD                                   | 5.6                       |
| HV27      | 2017/8/24        | 05:14            | 2017/8/24      | 17:01          | 11.3                                    | LOD                                     | LOD                                   | 22.8                                               | 6.0                                                | 4.7                                                | LOD                                   | 5.7                       |
| HV29      | 2017/8/24        | 17:18            | 2017/8/25      | 05:03          | 4.2                                     | LOD                                     | -20.2                                 | 15.8                                               | 5.1                                                | 4.0                                                | 7.3                                   | 5.1                       |
| HV31      | 2017/8/25        | 06:08            | 2017/8/25      | 16:57          | 5.8                                     | 51.0                                    | -20.8                                 | 21.6                                               | 3.7                                                | 4.6                                                | 0.4                                   | 6.2                       |
| HV32      | 2017/8/25        | 17:10            | 2017/8/26      | 04:56          | 4.8                                     | 2.4                                     | -21.8                                 | 11.4                                               | 1.7                                                | 1.9                                                | LOD                                   | 5.2                       |
| HV33      | 2017/8/26        | 05:15            | 2017/8/26      | 16:59          | 5.3                                     | LOD                                     | LOD                                   | 28.0                                               | 3.5                                                | 3.0                                                | 4.9                                   | 18.4                      |
| HV34      | 2017/8/26        | 17:18            | 2017/8/27      | 05:34          | 5.9                                     | LOD                                     | LOD                                   | 16.0                                               | 14.7                                               | 13.2                                               | 9.4                                   | 10.3                      |
| HV35      | 2017/8/27        | 05:55            | 2017/8/27      | 16:53          | 16.3                                    | 186.9                                   | -25.5                                 | 50.5                                               | 4.4                                                | 4.5                                                | 20.9                                  | 11.9                      |
| HV36      | 2017/8/27        | 17:05            | 2017/8/28      | 04:57          | 19.5                                    | 151.3                                   | -21.6                                 | 66.0                                               | 5.8                                                | 2.2                                                | 26.4                                  | 14.3                      |
| HV37      | 2017/8/28        | 05:13            | 2017/8/28      | 17:19          | 6.0                                     | 99.5                                    | -22.3                                 | 74.8                                               | 3.2                                                | 2.5                                                | 13.3                                  | 12.3                      |
| HV38      | 2017/8/28        | 17:33            | 2017/8/29      | 04:58          | 0.7                                     | 142.3                                   | -21.7                                 | 90.8                                               | 4.6                                                | 4.0                                                | 4.2                                   | 26.2                      |
| HV41      | 2017/8/30        | 06:18            | 2017/8/30      | 17:53          | 12.5                                    | LOD                                     | LOD                                   | 13.8                                               | 3.1                                                | 3.6                                                | 24.6                                  | 23.9                      |
| HV42      | 2017/8/30        | 18:03            | 2017/8/31      | 05:57          | 2.7                                     | LOD                                     | LOD                                   | 28.5                                               | 6.5                                                | 1.0                                                | 62.0                                  | 19.1                      |
| HV43      | 2017/8/31        | 06:20            | 2017/8/31      | 18:00          | 7.7                                     | LOD                                     | LOD                                   | 9.3                                                | 4.0                                                | 2.0                                                | 38.8                                  | 12.0                      |
| HV44      | 2017/8/31        | 18:11            | 2017/9/1       | 06:02          | LOD                                     | LOD                                     | -22.4                                 | 48.0                                               | 10.0                                               | 2.8                                                | 36.9                                  | 21.4                      |
| HV45      | 2017/9/1         | 06:16            | 2017/9/1       | 17:55          | 21.0                                    | LOD                                     | LOD                                   | 24.0                                               | 19.3                                               | 23.4                                               | 31.8                                  | 55.5                      |

|      |           |       |           |       |      |       |       |       |      |     |       |      |
|------|-----------|-------|-----------|-------|------|-------|-------|-------|------|-----|-------|------|
| HV47 | 2017/9/2  | 05:42 | 2017/9/2  | 18:41 | 3.1  | LOD   | -24.2 | 42.2  | 11.8 | 3.9 | 22.3  | 13.0 |
| HV48 | 2017/9/2  | 18:52 | 2017/9/3  | 05:48 | LOD  | LOD   | -23.2 | 59.4  | 7.5  | 5.4 | 38.6  | 71.0 |
| HV49 | 2017/9/3  | 06:04 | 2017/9/3  | 17:52 | 4.6  | 0.9   | LOD   | 42.1  | 4.0  | 1.5 | 12.1  | 14.1 |
| HV5  | 2017/9/3  | 18:04 | 2017/9/4  | 06:03 | 10.5 | LOD   | LOD   | 60.5  | 9.1  | 2.6 | 7.2   | 25.1 |
| HV51 | 2017/9/4  | 06:18 | 2017/9/4  | 18:32 | 0.9  | LOD   | LOD   | 114.3 | 20.4 | 7.9 | 24.5  | 42.0 |
| HV52 | 2017/9/4  | 18:42 | 2017/9/5  | 07:19 | LOD  | LOD   | LOD   | 53.0  | 38.8 | 2.0 | 17.5  | 22.9 |
| HV53 | 2017/9/5  | 07:48 | 2017/9/5  | 17:02 | 21.9 | LOD   | LOD   | 60.1  | 2.6  | 2.6 | 3.7   | 13.0 |
| HV54 | 2017/9/5  | 17:22 | 2017/9/6  | 04:00 | 6.0  | LOD   | LOD   | 78.6  | 2.9  | 1.1 | 7.4   | 20.7 |
| HV57 | 2017/9/12 | 20:22 | 2017/9/13 | 20:21 | 2.4  | LOD   | LOD   | 95.0  | 2.9  | 1.1 | 13.7  | 15.8 |
| HV58 | 2017/9/13 | 20:41 | 2017/9/15 | 00:29 | 0.1  | LOD   | -24.2 | 46.8  | 4.3  | 1.9 | 44.4  | 11.6 |
| HV6  | 2017/9/16 | 6:47  | 2017/9/17 | 08:05 | LOD  | 9.5   | -22.6 | 68.2  | 2.2  | 1.4 | 59.2  | 12.8 |
| HV61 | 2017/9/17 | 09:15 | 2017/9/18 | 7:39  | 1.8  | LOD   | -24.2 | 47.7  | 1.5  | 1.1 | 33.6  | 16.3 |
| HV63 | 2017/9/18 | 7:55  | 2017/9/22 | 9:57  | 3.3  | 18.3  | -22.6 | 49.2  | 0.6  | 0.5 | 30.5  | 10.4 |
| HV64 | 2017/9/22 | 10:48 | 2017/9/24 | 7:34  | 2.7  | LOD   | LOD   | 78.3  | 5.2  | 2.3 | 25.9  | 31.1 |
| HV65 | 2017/9/24 | 7:58  | 2017/9/28 | 2:08  | 4.8  | 8.8   | -23.3 | 32.8  | 0.8  | 1.7 | 13.0  | 6.6  |
| HV66 | 2017/9/28 | 3:09  | 2017/9/29 | 21:08 | 5.8  | LOD   | -26.7 | 29.3  | 0.4  | 0.5 | 8.7   | 6.5  |
| HV67 | 2017/9/29 | 21:20 | 2017/10/2 | 15:50 | 0.7  | 10.9  | LOD   | 45.4  | 1.1  | 0.8 | 13.3  | 9.4  |
| HV68 | 2017/10/2 | 16:12 | 2017/10/4 | 21:12 | 61.3 | 537.9 | -23.0 | 424.4 | 92.8 | 3.2 | 558.0 | 22.1 |

**Table S2: The data of coarse particles.**

| Sample ID | Start Date (UTC) | Start Time (UTC) | End Date (UTC) | End Time (UTC) | WSON (ngNm <sup>-3</sup> ) | NH <sub>4</sub> <sup>+</sup> (ng m <sup>-3</sup> ) | NO <sub>3</sub> <sup>-</sup> (ng m <sup>-3</sup> ) | NO <sub>2</sub> <sup>-</sup> (ng m <sup>-3</sup> ) | Na <sup>+</sup> (ng m <sup>-3</sup> ) | MSA (ng m <sup>-3</sup> ) |
|-----------|------------------|------------------|----------------|----------------|----------------------------|----------------------------------------------------|----------------------------------------------------|----------------------------------------------------|---------------------------------------|---------------------------|
| HVS 9-12  | 2017/8/13        | 04:29            | 2017/8/17      | 02:56          | LOD                        | 58.8                                               | 4987.3                                             | 341.2                                              | 53950.1                               | 1073.6                    |
| HVS 13-16 | 2017/8/17        | 03:39            | 2017/8/21      | 03:51          | LOD                        | 27.5                                               | 5938.1                                             | 58.1                                               | 16308.0                               | 236.4                     |
| HVS 21-24 | 2017/8/25        | 06:08            | 2017/8/29      | 04:58          | 36.4                       | 11.9                                               | 1249.4                                             | 61.6                                               | 5380.0                                | 32.2                      |
| HVS 33-36 | 2017/9/12        | 20:22            | 2017/9/17      | 08:05          | 12.2                       | 5.5                                                | 701.5                                              | LOD                                                | 8372.2                                | 25.9                      |
| HVS 37-40 | 2017/9/17        | 09:15            | 2017/9/22      | 9:57           | 15.1                       | LOD                                                | 616.0                                              | 16.5                                               | 6271.5                                | 23.9                      |
| HVS 41-44 | 2017/9/22        | 10:48            | 2017/9/28      | 2:08           | LOD                        | 11.0                                               | 1118.6                                             | 415.3                                              | 7810.3                                | 36.7                      |
| HVS 45-48 | 2017/9/28        | 3:09             | 2017/10/2      | 15:50          | 4.4                        | 2.0                                                | 302.0                                              | LOD                                                | 917.7                                 | 6.6                       |
| HVS 49-52 | 2017/10/2        | 16:12            | 2017/10/4      | 21:12          | 7.9                        | 31.0                                               | 1040.7                                             | LOD                                                | 12990.7                               | LOD                       |

**Table S3: The surface seawater data.**

| Station No. | Sampling Date and Time | Longitude (°E) | Latitude (°N) | N <sub>2</sub> -fixation rate (ngN L <sup>-1</sup> day <sup>-1</sup> ) | Primary Production (ngC L <sup>-1</sup> day <sup>-1</sup> ) |
|-------------|------------------------|----------------|---------------|------------------------------------------------------------------------|-------------------------------------------------------------|
| 7           | 2017/8/25 14:06        | 230.0          | 23.0          | 41.75                                                                  | 4040                                                        |
| 8           | 2017/8/28 14:03        | 220.0          | 23.0          | 31.47                                                                  | 4068                                                        |
| 10          | 2017/9/3 15:02         | 200.0          | 21.5          | 42.60                                                                  | 5270                                                        |
| 11          | 2017/9/14 15:59        | 190.0          | 21.5          | 26.50                                                                  | 4580                                                        |
| 12          | 2017/9/17 17:03        | 180.0          | 23.0          | 11.18                                                                  | 2326                                                        |
| 13          | 2017/9/20 17:03        | 170.0          | 23.0          | 16.17                                                                  | 3314                                                        |
| 14          | 2017/9/23 18:00        | 160.0          | 23.0          | 5.16                                                                   | 1983                                                        |
| 15          | 2017/9/27 19:00        | 150.0          | 23.0          | 10.26                                                                  | 2485                                                        |
| 16          | 2017/9/30 18:58        | 140.0          | 23.0          | 8.59                                                                   | 3119                                                        |
| 17          | 2017/10/1 19:38        | 137.0          | 23.0          | 2.86                                                                   | 2493                                                        |
